# Supplementary material
Source: publisher figshare collection journal article supplement (https://tandf.figshare.com/articles/dataset/_/4251833)
Supplement: Supplementary file 1 [file 1]

Supplementary Figure 1: Correlation of MMP-9 mRNA expression in PBMC of COPD patients to (A) FEV1 (%), (B) FVC (%) and (C) FEV1/FVC (%). FEV1/FVC values are percent of predicted.

Supplementary Figure 2: Correlation of NE mRNA expression in PBMC of COPD patients to (A) FEV1 (%), (B) FVC (%) and (C) FEV1/FVC (%). FEV1/FVC values are percent of predicted.
